# Supplementary material
Source: PubMed Central journal article supplement (PMC3644510)
Supplement: NIHMS435894-supplement-01.pdf [file NIHMS435894-supplement-01.pdf]

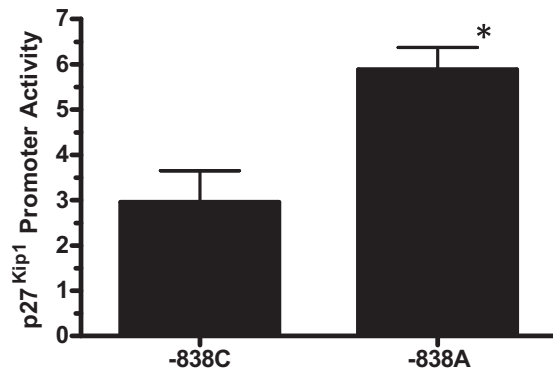

**Supplementary Fig (online only).** Effect of the  $p27^{kip1}$ -838C>A polymorphism on  $p27^{kip1}$  promoter activity in human venous fibroblasts. Primary cultured adventitial fibroblasts from human saphenous vein (Kenagy et al J Vasc Surgery 2009; 49:1282-8) were transfected by electroporation with the indicated  $p27^{kip1}$  promoter-luciferase constructs used by van Tiel et al (Circulation 2009; 120:669-676) containing the -838A or -838C variant. One day after transfection, cells were changed to serum-free medium for 24 hours and firefly luciferase activity measured. Luciferase activity was normalized to *Renilla* luciferase and expressed as fold of the empty pGL3 shuttle vector. Data shown are mean of four independent experiments ( $P < .006$  by paired  $t$  test).

**Supplementary Table I (online only).** Patient inclusion and exclusion criteria for Seattle cohort

| Category                   | Including                                                                                                                                                                                                                                                                                                                        | Excluding                                                                                                                                                                                                             |
|----------------------------|----------------------------------------------------------------------------------------------------------------------------------------------------------------------------------------------------------------------------------------------------------------------------------------------------------------------------------|-----------------------------------------------------------------------------------------------------------------------------------------------------------------------------------------------------------------------|
| Type of surgical operation | Elective infrainguinal arterial bypass with autogenous vein for claudication or critical limb ischemia due to chronic atherosclerotic occlusive disease. Simultaneous endovascular inflow procedures permitted.                                                                                                                  | Operations for nonatherosclerotic, or aneurysmal disease. Simultaneous femoral–femoral, or aortobifemoral bypass. Post-op graft thrombosis for technical reasons, within the first 30 days.                           |
| Conduit                    | Autogenous vein graft >15 cm, including high-risk vein grafts <sup>a</sup> (single or spliced non-GSV segments, vein diameter <3 mm, surgical revisions or corrections performed at index operation).                                                                                                                            | Composite grafts that include prosthetic conduits. Thrombectomy and/or revision of an existing graft.                                                                                                                 |
| Systemic conditions        | Stable malignancy (eg, prostate cancer) <sup>a</sup><br>Diabetes mellitus <sup>a</sup><br>Smoking <sup>a</sup><br>Hyperlipidemia <sup>a</sup><br>Statin therapy <sup>a</sup><br>Any type of antithrombotic therapy <sup>a</sup><br>Renal impairment (if BUN <60 mg/dL) <sup>a</sup><br>Previously failed leg bypass <sup>a</sup> | Actively progressive malignancy<br>Chemotherapy for malignancy ( $\leq 3$ months)<br>Renal failure (dialysis)<br>Systemic inflammatory disease (eg, lupus)<br>Invasive infection<br>A diagnosed hypercoagulable state |
| Patient characteristics    | Age <sup>a</sup> : >18 years; race <sup>a</sup> : all races                                                                                                                                                                                                                                                                      | Age <sup>a</sup> : <18 years                                                                                                                                                                                          |
| Administrative             |                                                                                                                                                                                                                                                                                                                                  | Already enrolled in an investigational drug study.<br>Previously enrolled in this study.<br>Can't follow-up, expected survival <6 months.                                                                             |

BUN, Blood urea nitrogen; GSV, great saphenous vein.

<sup>a</sup>These conditions are identified as prospective covariables.

**Supplementary Table II (online only).** Characteristics of Seattle cohort by  $p27^{Kip1}$ -838 genotype

| <i>Variable<sup>a</sup></i> | -838AA      | -838CA     | -838CC     |
|-----------------------------|-------------|------------|------------|
| Patients                    | 6 (11.5)    | 34 (65.4)  | 12 (23.1)  |
| Age, years                  | 69.3 ± 12.6 | 65.4 ± 7.9 | 63.8 ± 6.8 |
| Male sex                    | 5 (83.3)    | 31 (91.2)  | 12 (100.0) |
| Caucasian race              | 6 (100)     | 34 (100)   | 11 (92)    |
| CLI                         | 6 (100)     | 19 (56)    | 7 (58)     |
| Diabetes mellitus           | 4 (67)      | 14 (41)    | 2 (17)     |
| CAD/CVD                     | 1 (17)      | 13 (38)    | 4 (33)     |
| Current tobacco             | 2 (33)      | 16 (47)    | 7 (58)     |
| Tissue loss                 | 2 (33)      | 14 (41)    | 3 (25)     |
| Infrapopliteal target       | 2 (33)      | 8 (24)     | 0 (0)      |

CAD, Coronary artery disease; CLI, critical limb ischemia; CVD, cerebrovascular disease.

<sup>a</sup>Continuous data are shown as mean ± standard deviation and categorical data as number (%).

**Supplementary Table III (online only).** Summary of clinical outcomes in Seattle cohort by  $p27^{Kip1}$ -838 genotype

| <i>Outcome</i>          | AA<br>No. (%) | CA<br>No. (%) | CC<br>No. (%) | Total<br>No. (%) |
|-------------------------|---------------|---------------|---------------|------------------|
| Loss of primary patency | 1 (17)        | 15 (44)       | 3 (25)        | 19 (37)          |
